# Supplementary material for: Face-to-face stacking in sulfonamide based bis-ethylene bridged heteroaromatic dimers
Source: Royal Society of Chemistry journal article supplement (doi:10.1039/c5ra12230a), 2015-01-01

**Electronic Supplementary Information (ESI)**  
**for**

**Face-to-Face Stacking in Sulfonamide Based Bis-ethylene Bridged Heteroaromatic Dimers**

Ranjeet Kumar,<sup>a1</sup> Sunil K. Rai,<sup>a1</sup> Praveen Singh,<sup>a</sup> Archana Gaurav,<sup>a</sup> Pratima Yadav,<sup>a</sup> Ranjana S. Khanna,<sup>a</sup> Hariom Gupta<sup>b</sup> and Ashish K. Tewari<sup>a\*</sup>

<sup>a</sup>Department of Chemistry (Center of Advanced Studies), Faculty of Science, Banaras Hindu University, Varanasi, 221005, INDIA.

<sup>b</sup>Analytical Discipline and Centralized Instrument Facility, CSMCRI, Gijubhai Badheka Marg, Bhavnagar 364021, Gujarat, India.

<sup>1</sup>Both authors have contributed equally.

*Email:* [tashish2002@yahoo.com](mailto:tashish2002@yahoo.com)

**Contents**

|                                                                    |      |
|--------------------------------------------------------------------|------|
| 1- Single Crystal X-Ray Analysis. ....                             | 1-6  |
| 2. Computational studies.....                                      | 7-8  |
| 3- Copies of <sup>1</sup> HNMR and <sup>13</sup> CNMR spectra..... | 9-17 |

**1- Single Crystal X-Ray Analysis:**

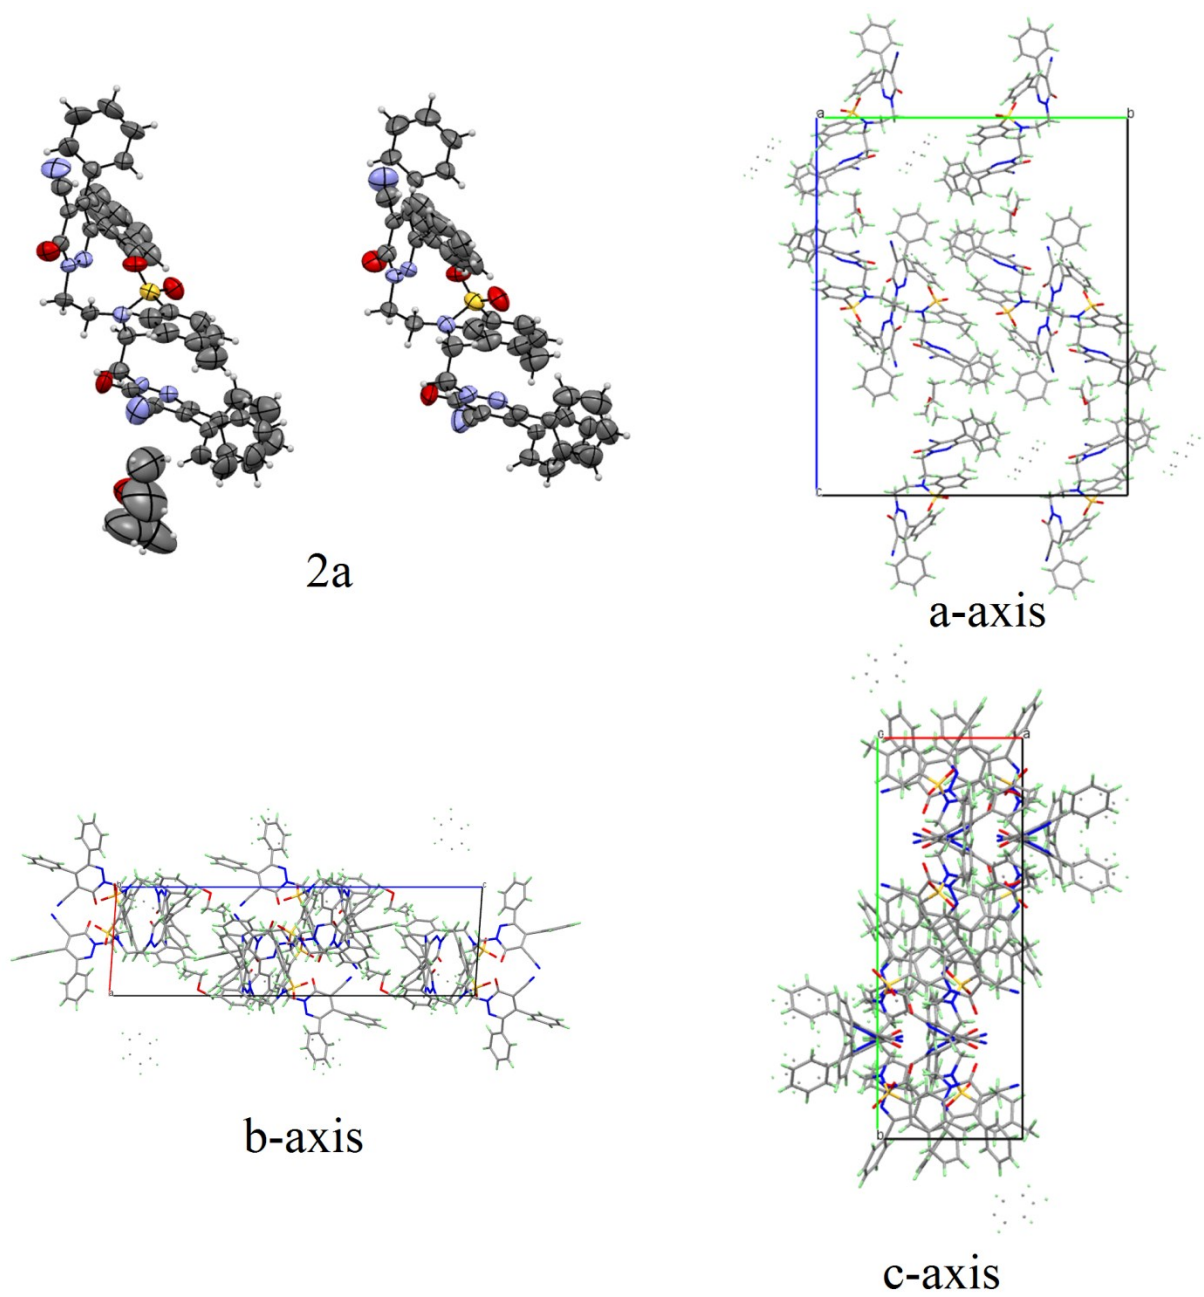

**Fig. S1.** ORTEP diagram and packing of compound **2a** depicted along a, b and c axis.

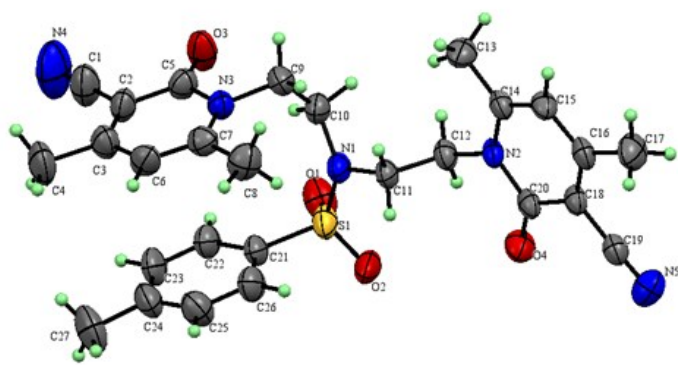

**2b**

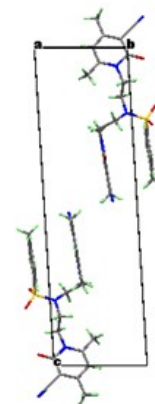

*a* axis

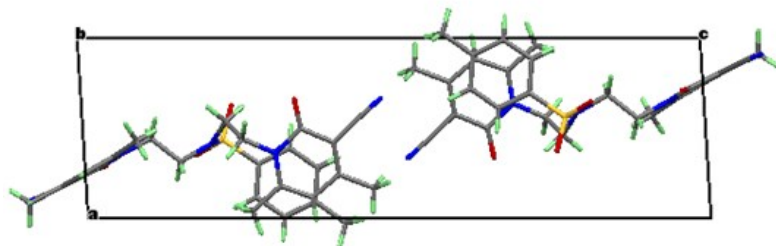

*b* axis

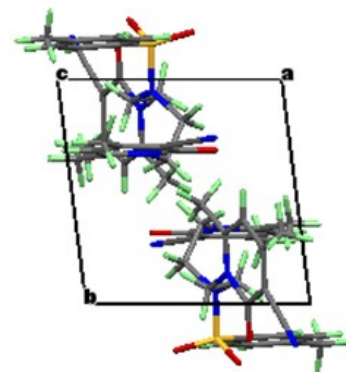

*c* axis

**Fig. S2.** ORTEP diagram and packing of compound **2b** depicted along *a*, *b* and *c* axis.

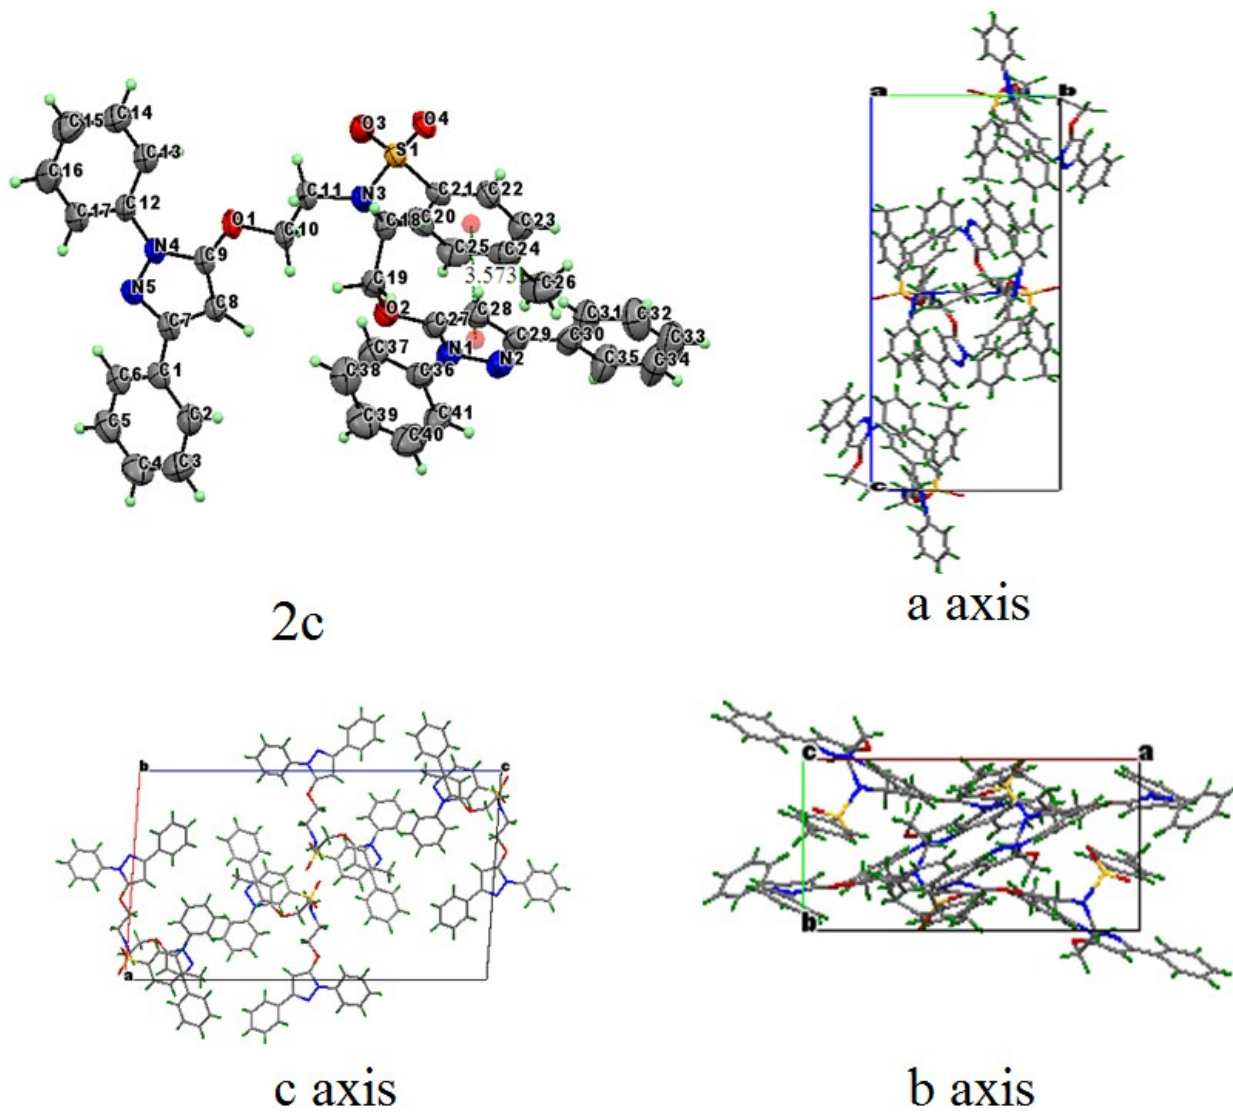

**Fig. S3.** ORTEP diagram and packing of compound **2c** depicted along *a*, *b* and *c* axis.

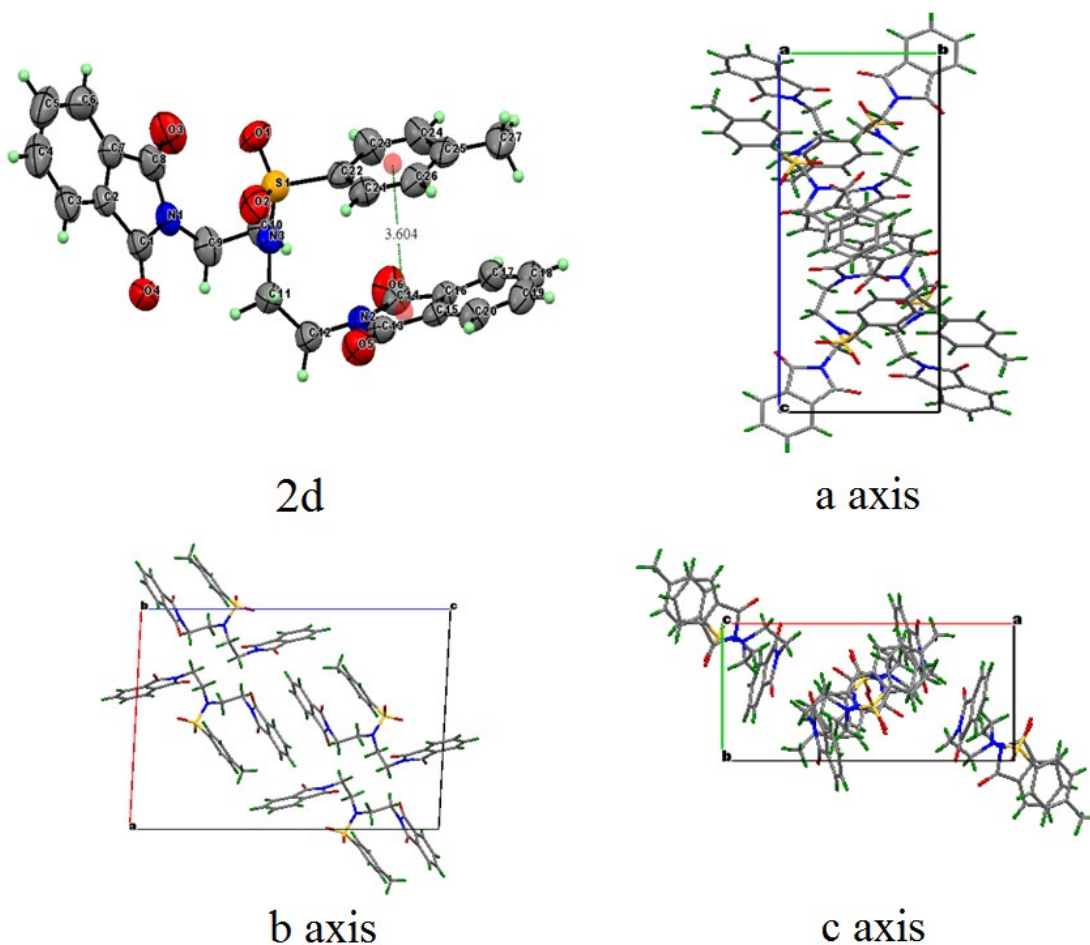

**Fig. S4.** ORTEP diagram and packing of compound **2d** depicted along a, b and c axis.

# Responses to the Validation Reply Form

\_vrf\_RFACG01\_2a;

PROBLEM: The value of the R factor is > 0.10

RESPONSE: Crystals diffracted extremely weakly. Multiple attempts were made to grow better diffracting crystals. Data was collected many times but all results were consistent with the model in this report. However, all yielded serious problems due to weak diffraction and disorder in the atom positions. The high weighted R factor results from the weak diffraction, and the inclusion of reflections that are essentially unobserved.

\_vrf\_PLAT082\_2a;

PROBLEM: High R1 Value ..... 0.11 Report

RESPONSE: Crystals diffracted extremely weakly. Multiple attempts were made to grow better diffracting crystals. Data was collected many times but all results were consistent with the model in this report. However, all yielded serious problems due to weak diffraction and disorder in the atom positions. The high weighted R factor results from the weak diffraction, and the inclusion of reflections that are essentially unobserved.

\_vrf\_PLAT094\_2a;

PROBLEM: Ratio of Maximum / Minimum Residual Density .... 2.54 Report

RESPONSE: These alerts are generated because there is a large amount of disorder in the structure.

\_vrf\_PLAT220\_2a;

PROBLEM: Large Non-Solvent C Ueq(max)/Ueq(min) Range 3.4 Ratio

RESPONSE: C-atoms were introduced in calculated positions and refined on a riding model. Uiso(C) was calculated from U(ave) of the atom.

\_vrf\_PLAT234\_2a;

PROBLEM: Large Hirshfeld Difference N5 -- C28 .. 0.17 Ang.

RESPONSE: RIGU restraints were applied to atoms in the disordered chains. Several of the atoms were still not ideally shaped, however, this does not indicate an incorrect atom-type assignment.

\_vrf\_PLAT230\_2b

PROBLEM: Hirshfeld Test Diff for S1 -- O1 .. 7.5 su

RESPONSE: RIGU restraints were applied to atoms in the disordered chains. Several of the atoms were still not ideally shaped, however, this does not indicate an incorrect atom-type assignment.

**Table-S1:** Intermolecular interactions in **2a**, **2b**, **2c** and **2d**.

| Crystals  | Interaction                                        | d(Å)  | D(Å)  | θ(d)   | Symmetry Code        |
|-----------|----------------------------------------------------|-------|-------|--------|----------------------|
| <b>2a</b> |                                                    |       |       |        |                      |
|           | C67-H67...N4                                       | 0.93  | 2.691 | 135.0  | -x,-1/2+y,1/2-z      |
|           | C17A-H17A...O2                                     | 0.93  | 2.510 | 133.6  | -1+x,y,z             |
|           | C72-H72A...O3                                      | 0.970 | 2.334 | 146.3  | -x,1-y,1-z           |
|           | C27-H27B...O7                                      | 0.971 | 2.345 | 142.2  | 1-x,1-y,1-z          |
|           | C91-H91C...N14                                     | 0.96  | 2.55  | 148    | 2-x,1/2+y,1.5-z      |
|           | C62A-H62A...O5                                     | 0.93  | 2.480 | 133.2  | -1+x,y,z             |
|           | C82-H82...O5                                       | 0.93  | 2.560 | 149.2  | -x,2-y,1-z           |
|           | C94-H94B...N7                                      | 0.96  | 2.69  | 158    | -1+x,y,z             |
|           | C92-H92B...N12                                     | 0.98  | 2.722 | 145    | 1-x,1/2+y,1.5-z      |
|           | C35-H35...π (Centroid of pyridazinone phenyl)      | 0.93  | 3.514 | 143.36 |                      |
|           | C21-H21...π (Centroid of pyridazinone phenyl)      | 0.93  | 3.659 | 128.51 |                      |
|           | C16A-H16A...π (Centroid of PTS ring)               | 0.93  | 3.252 | 136.84 |                      |
|           | C86-H86...π (Centroid of pyridazinone phenyl)      | 0.93  | 3.686 | 159.93 |                      |
|           | C63A-H63A...π (Centroid of PTS ring)               | 0.93  | 3.057 | 136.72 |                      |
| <b>2b</b> |                                                    |       |       |        |                      |
|           | C11-H11A...N5                                      | 0.970 | 2.679 | 114.1  | -x,-y,2-z            |
|           | C17-H17A...N5                                      | 0.960 | 2.742 | 178.2  | x,-1+y,z             |
|           | C15-H15...O4                                       | 0.931 | 2.707 | 145.2  | x,1+y,z              |
|           | C13-H13B...O2                                      | 0.960 | 2.448 | 127.7  | x,1+y,z              |
|           | C25-H25...O1                                       | 0.930 | 2.550 | 140.7  | -1+x,y,z             |
|           | C6-H6...O3                                         | 0.931 | 2.431 | 160.2  | -1+x,y,z             |
|           | C8-H8A...O3                                        | 0.960 | 2.650 | 157.1  | -1+x,y,z             |
|           | C27-H27C...π (Centroid of pyridone ring)           | 0.960 | 3.759 | 120.78 |                      |
|           | C8C-H8C...π (Centroid of PTS ring)                 | 0.960 | 3.421 | 121.36 |                      |
|           | C12-H12A...π (Centroid of pyridone ring)           | 0.970 | 3.461 | 114.87 |                      |
| <b>2c</b> |                                                    |       |       |        |                      |
|           | π...π (Centroid of five member ring of pyrazolone) |       | 3.943 |        |                      |
|           | C28-H28...O4                                       | 0.928 | 2.454 | 173.2  | 1-x,-y,1-z           |
|           | C19H19A...O3                                       | 0.970 | 2.630 | 128.8  | x,-1+y,z             |
|           | C6H6...O3                                          | 0.931 | 2.555 | 132.0  | 2-x,-1-y,1-z         |
|           | C26-H26B...π (Centroid of pyrazolone phenyl)       | 0.961 | 3.078 | 157.71 |                      |
|           | C16-H16...π (Centroid of pyrazolone phenyl)        | 0.930 | 3.014 | 122.30 |                      |
|           | C049-H049...π (Centroid of pyrazolone phenyl)      | 0.930 | 3.165 | 132.59 |                      |
|           | C11-H1B...π (Centroid of pyrazolone phenyl)        | 0.969 | 2.859 | 163.94 |                      |
|           | C2-H2...π (Centroid of pyrazolone phenyl)          | 0.930 | 3.356 | 146.07 |                      |
| <b>2d</b> |                                                    |       |       |        |                      |
|           | C24-H24...O2                                       | 0.930 | 2.691 | 138.2  | -1/2+x,1.5-y,-1/2+z  |
|           | C19-H19...O3                                       | 0.930 | 2.662 | 129.1  | -1/2+x,-1/2-y,-1/2+z |
|           | C3-H3...O3                                         | 0.930 | 2.579 | 130.0  | x,-1+y,z             |
|           | C17-H17...O5                                       | 0.930 | 2.470 | 119.8  | x,-1+y,z             |
|           | C20-H20...π (Centroid of PTS phenyl)               | 0.930 | 3.144 | 123.86 |                      |
|           | C19-H19...π (Centroid of Pthamide ring)            | 0.930 | 3.278 | 119.12 | 119.12               |
|           | C27-H27B...π (Centroid of PTS phenyl)              | 0.959 | 3.458 | 124.49 | 124.49               |

**2. Computational studies:**

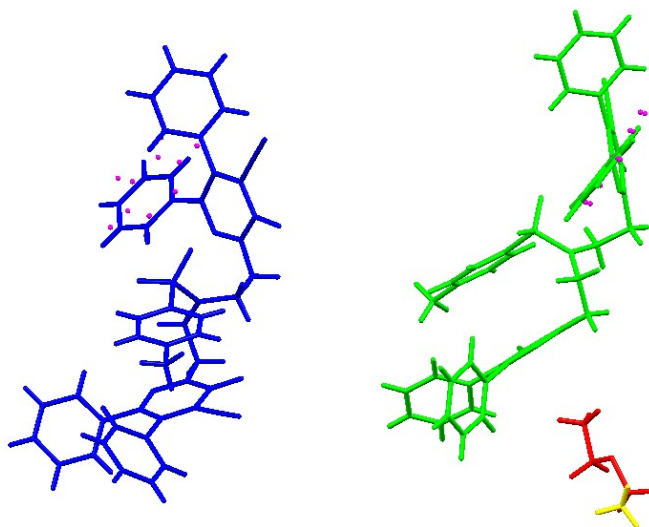

**Fig. S5** Crystal structure of compound **2a** showing two molecules in asymmetric unit.

**Table S2:** Intramolecular interaction and geometry parameters of compounds **2a**, **2b**, **2c** and **2d** calculated at  $\omega$ B97X-D /6-31G (d, p) level of theory compared with crystal structures.

| S.N.              | Crystal                                                                |       |       |              | $\omega$ B97X-D |       |              |
|-------------------|------------------------------------------------------------------------|-------|-------|--------------|-----------------|-------|--------------|
|                   | Interaction                                                            | d(Å)  | D(Å)  | $\theta$ (d) | d(Å)            | D(Å)  | $\theta$ (d) |
| <b>2a (Blue)</b>  | $\pi \cdots \pi$ (Centroid of PTS phenyl and Centroid of Pyridazinone) | -     | 3.754 | -            | -               | 3.614 | -            |
|                   | C53-H53B $\cdots$ O7                                                   | 0.969 | 2.655 | 114.3        | 1.091           | 2.764 | 109.41       |
|                   | C64A-H64A $\cdots$ O6                                                  | 0.93  | 2.967 | 165.7        | 1.084           | 2.400 | 152.24       |
|                   | C53-H53A $\cdots$ O8                                                   | 0.97  | 2.466 | 141.9        | 1.095           | 2.572 | 133.96       |
|                   | C72-H72B $\cdots$ N12                                                  | 0.968 | 2.656 | 69.8         | 1.090           | 2.624 | 95.73        |
|                   | C50-H50 $\cdots$ N14                                                   | 0.93  | 3.11  | 106.5        | 1.086           | 2.956 | 108.98       |
| <b>2a (Green)</b> | $\pi \cdots \pi$ (Centroid of PTS phenyl and Centroid of Pyridazinone) | -     | 3.789 | -            | -               | 3.614 | -            |
|                   | C8-H8A $\cdots$ O3                                                     | 0.971 | 2.726 | 112.9        | 1.091           | 2.764 | 109.41       |
|                   | C8-H8B $\cdots$ O4                                                     | 0.971 | 2.365 | 142.9        | 1.084           | 2.400 | 152.24       |
|                   | C15A-H15A $\cdots$ O1                                                  | 0.93  | 2.840 | 163.5        | 1.095           | 2.572 | 133.96       |
|                   | C5-H5 $\cdots$ N7                                                      | 0.931 | 3.15  | 103.5        | 1.090           | 2.624 | 95.73        |
|                   | C27-H27A $\cdots$ N6                                                   | 0.969 | 2.821 | 96.5         | 1.086           | 2.956 | 108.98       |
| <b>2b</b>         | $\pi \cdots \pi$ (Centroid of PTS phenyl and Centroid of Pyridone)     | -     | 3.734 | -            | -               | 3.587 | -            |
|                   | C10-H10A $\cdots$ O3                                                   | 0.969 | 2.5   | 114.1        | 1.090           | 2.354 | 114.63       |
|                   | C12-H12A $\cdots$ O2                                                   | 0.970 | 2.827 | 111.1        | 1.087           | 2.900 | 106.75       |
|                   | C11-H11A $\cdots$ O4                                                   | 0.970 | 3.094 | 103.13       | 1.088           | 2.225 | 116.90       |
|                   | C11-H11B $\cdots$ N2                                                   | 0.970 | 2.630 | 71.1         | 1.094           | 2.480 | 121.65       |
|                   | C12-H12A $\cdots$ N1                                                   | 0.970 | 2.714 | 65.4         | -               | -     | -            |



|           |                                                                                                |       |       |        |       |       |        |
|-----------|------------------------------------------------------------------------------------------------|-------|-------|--------|-------|-------|--------|
|           | C12-H12B...N1                                                                                  | 0.970 | 2.607 | 71.3   | -     | -     | -      |
|           | C10-H10B... $\pi$<br>(Pyridone<br>centroid)                                                    | -     | -     | -      | 1.094 | 2.544 | 152.20 |
| <b>2c</b> | $\pi$ ... $\pi$ (Centroid of<br>PTS phenyl and<br>Centroid of<br>Pyrazolone)                   | -     | 3.572 | -      | -     | 3.519 | -      |
|           | C10-H10B...O2                                                                                  | 0.970 | 2.843 | 124.5  | 1.094 | 2.511 | 131.94 |
|           | C26-H26C...N2                                                                                  | 0.960 | 2.963 | 122.8  | 1.093 | 2.773 | 123.33 |
|           | C032-H032...O2                                                                                 | 0.929 | 2.334 | 116.1  | 1.082 | 2.430 | 107.86 |
|           | C13-H13...O1                                                                                   | 0.929 | 2.358 | 112.9  | 1.081 | 2.374 | 109.79 |
|           | C17-H17...N5                                                                                   | 0.930 | 2.572 | 98.2   | 1.083 | 2.506 | 95.32  |
|           | C6-H6...N5                                                                                     | 0.931 | 2.610 | 97.9   | 1.085 | 2.527 | 97.09  |
|           | C35-H35...N2                                                                                   | 0.930 | 2.546 | 99.9   | 1.085 | 2.593 | 94.63  |
|           | C042-H042...N2                                                                                 | 0.930 | 2.498 | 99.7   | 1.084 | 2.563 | 93.51  |
| <b>2d</b> | $\pi$ ... $\pi$ (Centroid of<br>PTS phenyl and<br>Centroid of<br>Pthalimide<br>heteroaromatic) | -     | 3.605 | -      | -     | 3.574 | -      |
|           | C27-H27C... $\pi$<br>(phthalimide<br>centroide)                                                | 0.960 | 3.102 | 126.60 | 1.092 | 3.491 | 98.67  |
|           | C10-H10A...O6                                                                                  | 0.970 | 2.832 | 141.9  | 1.092 | 2.842 | 111.35 |
|           | C11-H11B...O5                                                                                  | 0.969 | 2.687 | 117.9  | 1.094 | 2.443 | 132.05 |
|           | C10-H10B...O3                                                                                  | 0.970 | 2.914 | 111.4  | 1.090 | 2.865 | 110.27 |
|           | C11-H11A...O4                                                                                  | 0.970 | 2.432 | 145.3  | 1.096 | 2.350 | 137.85 |

3-Copies of  $^1\text{H}$ -NMR and  $^{13}\text{C}$ -NMR spectra:

$^1\text{H}$ -NMR spectra of N,N-bis(2-chloroethyl)-4-methylbenzenesulfonamide (1):

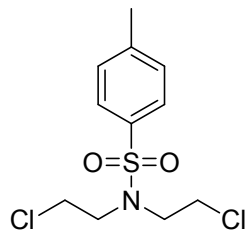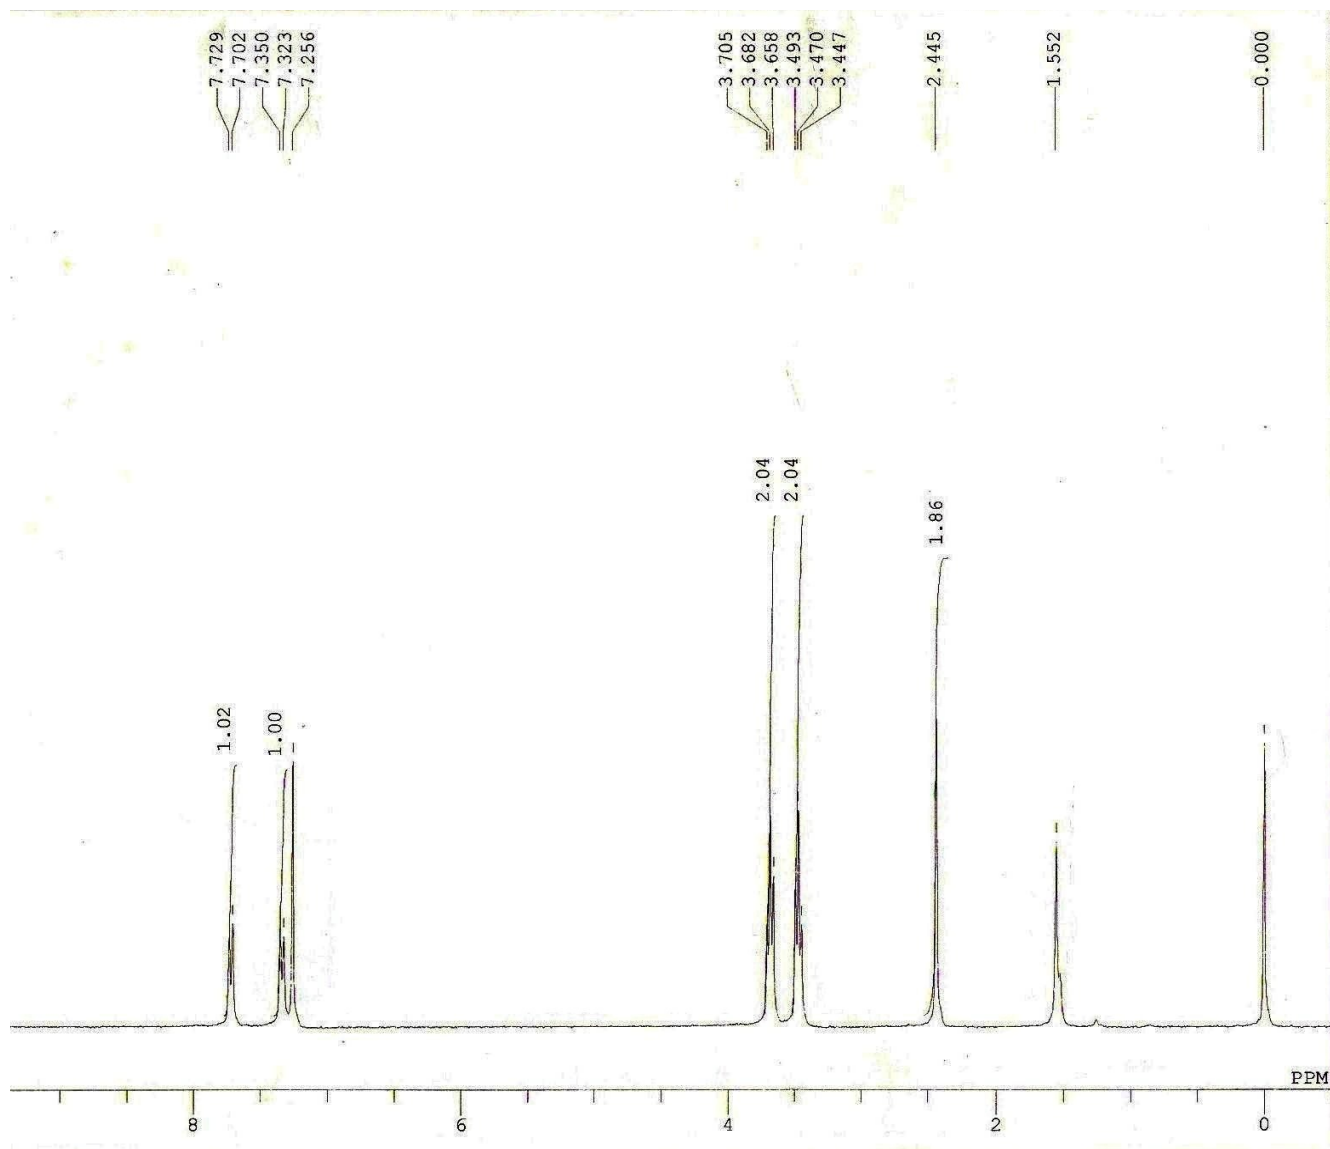

**<sup>1</sup>H-NMR and <sup>13</sup>C-NMR spectra of N,N-bis(2-(5-cyano-6-oxo-3,4-diphenylpyridazin-1(6H)-yl)ethyl)-4-methylbenzenesulfonamide (2a):**

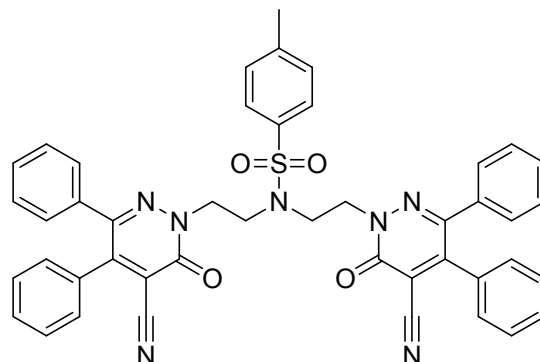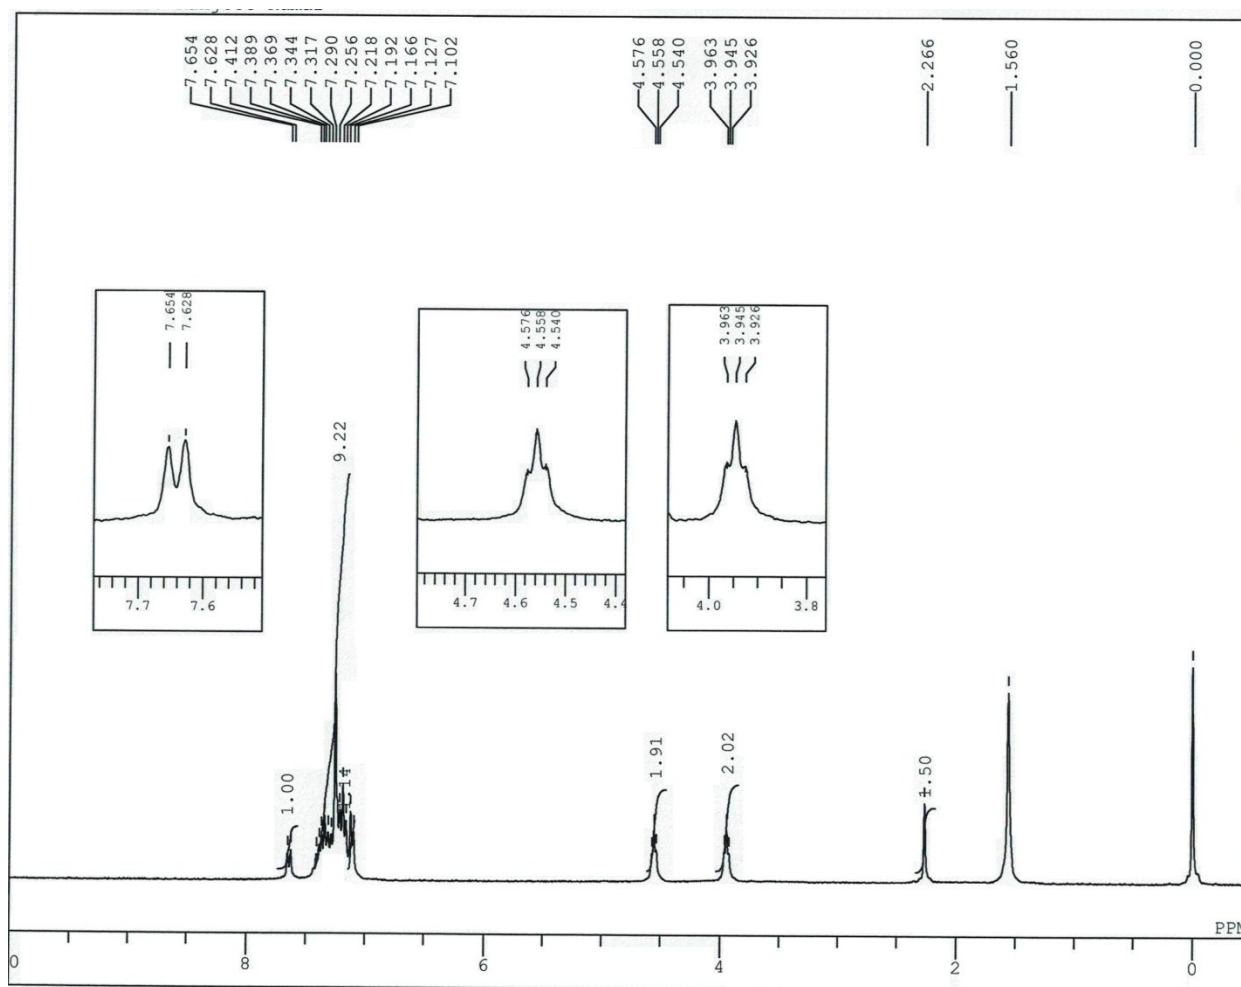

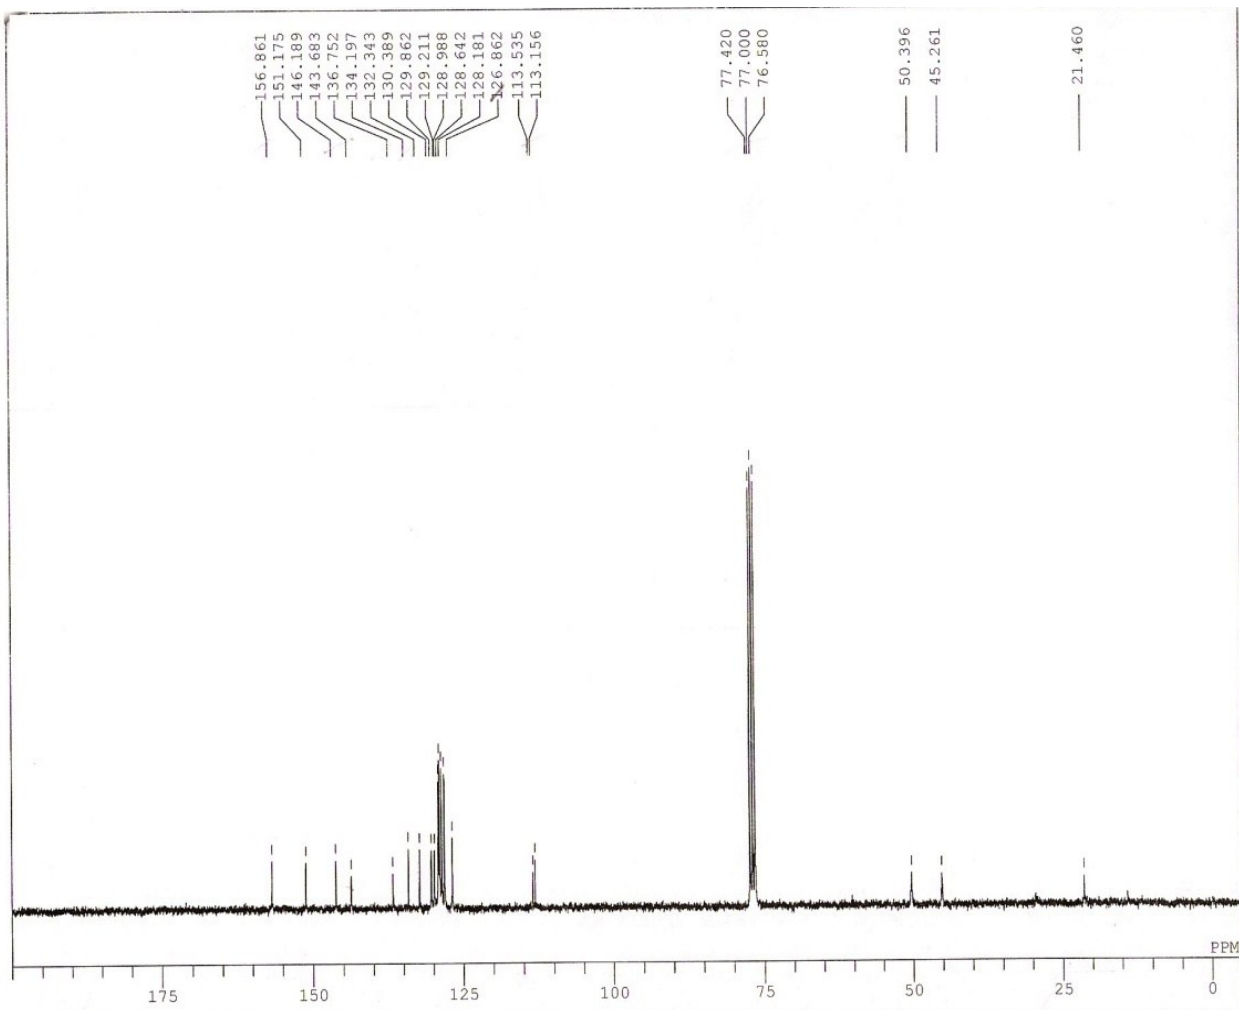

<sup>1</sup>H-NMR and <sup>13</sup>C-NMR spectra of N,N-bis(2-(3-cyano-4,6-dimethyl-2-oxopyridin-1(2H)-yl)ethyl)-4-methylbenzenesulfonamide (2b):

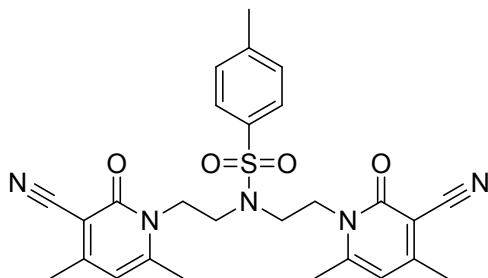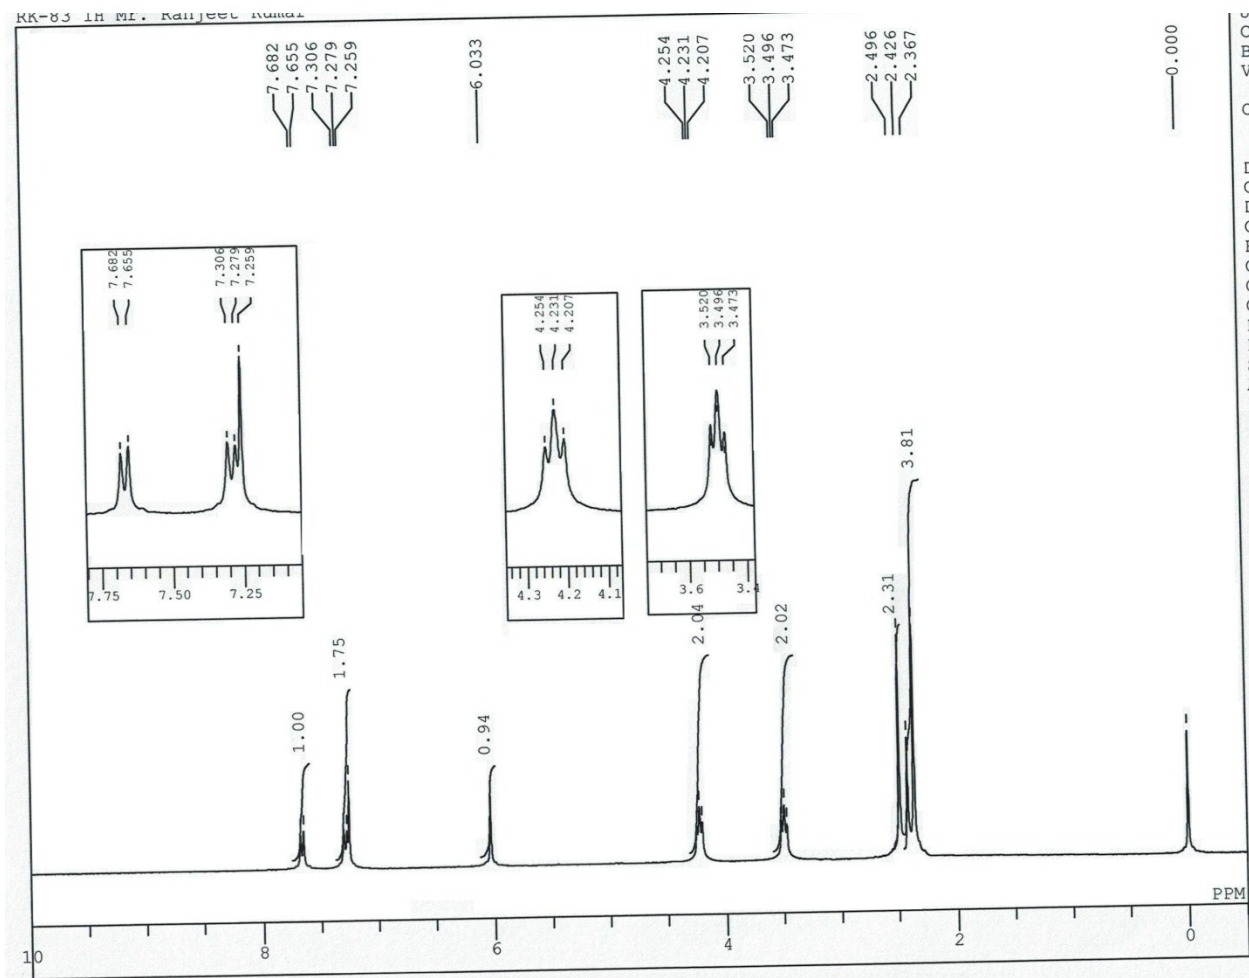

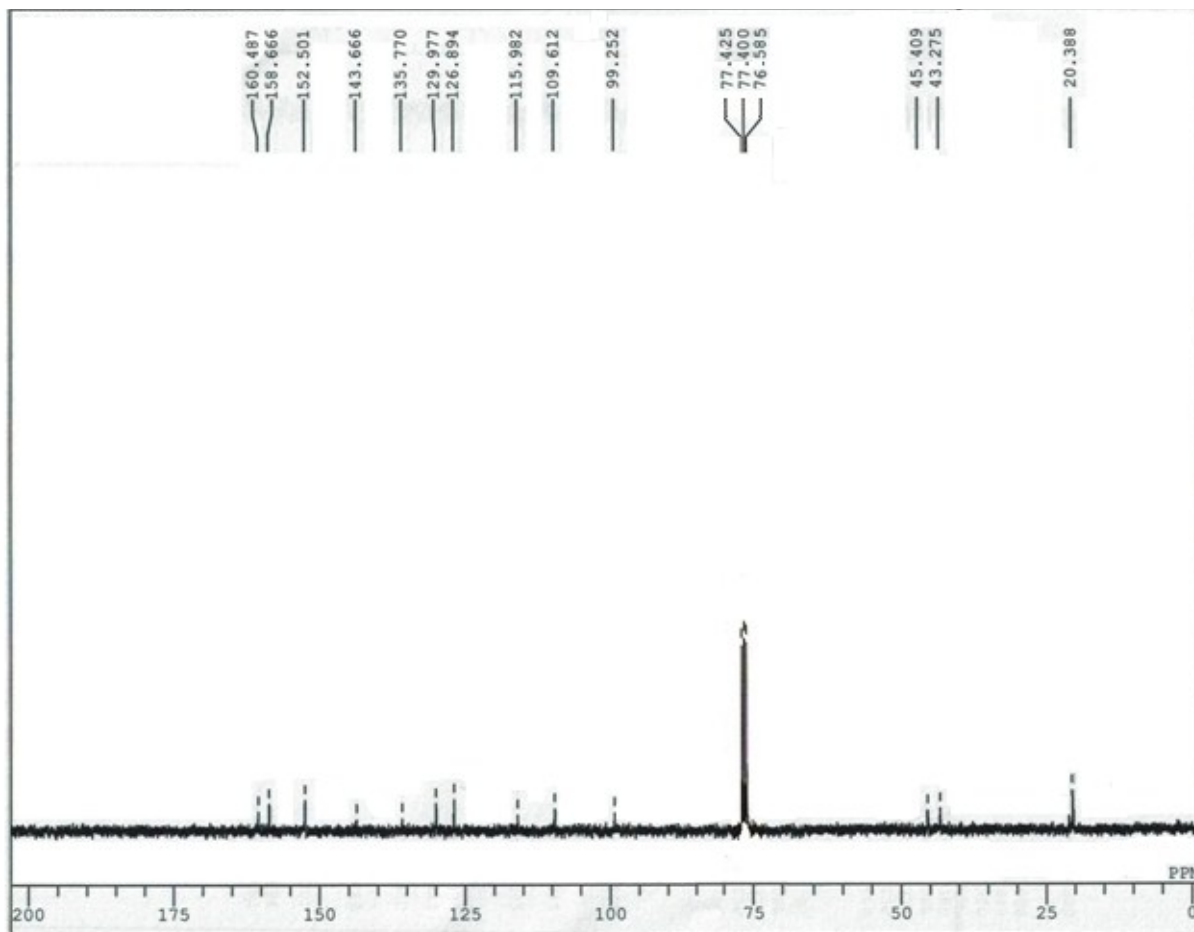

**<sup>1</sup>H-NMR and <sup>13</sup>C-NMR spectra of N,N-bis(2-((1,3-diphenyl-1H-pyrazol-5-yl)oxy)ethyl)-4-methylbenzenesulfonamide (2c):**

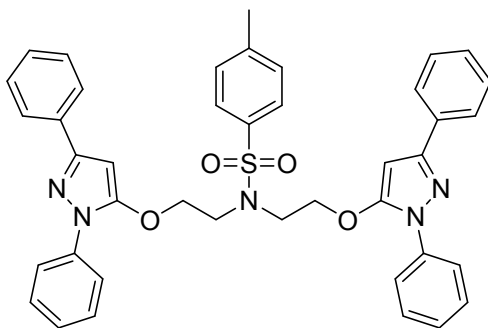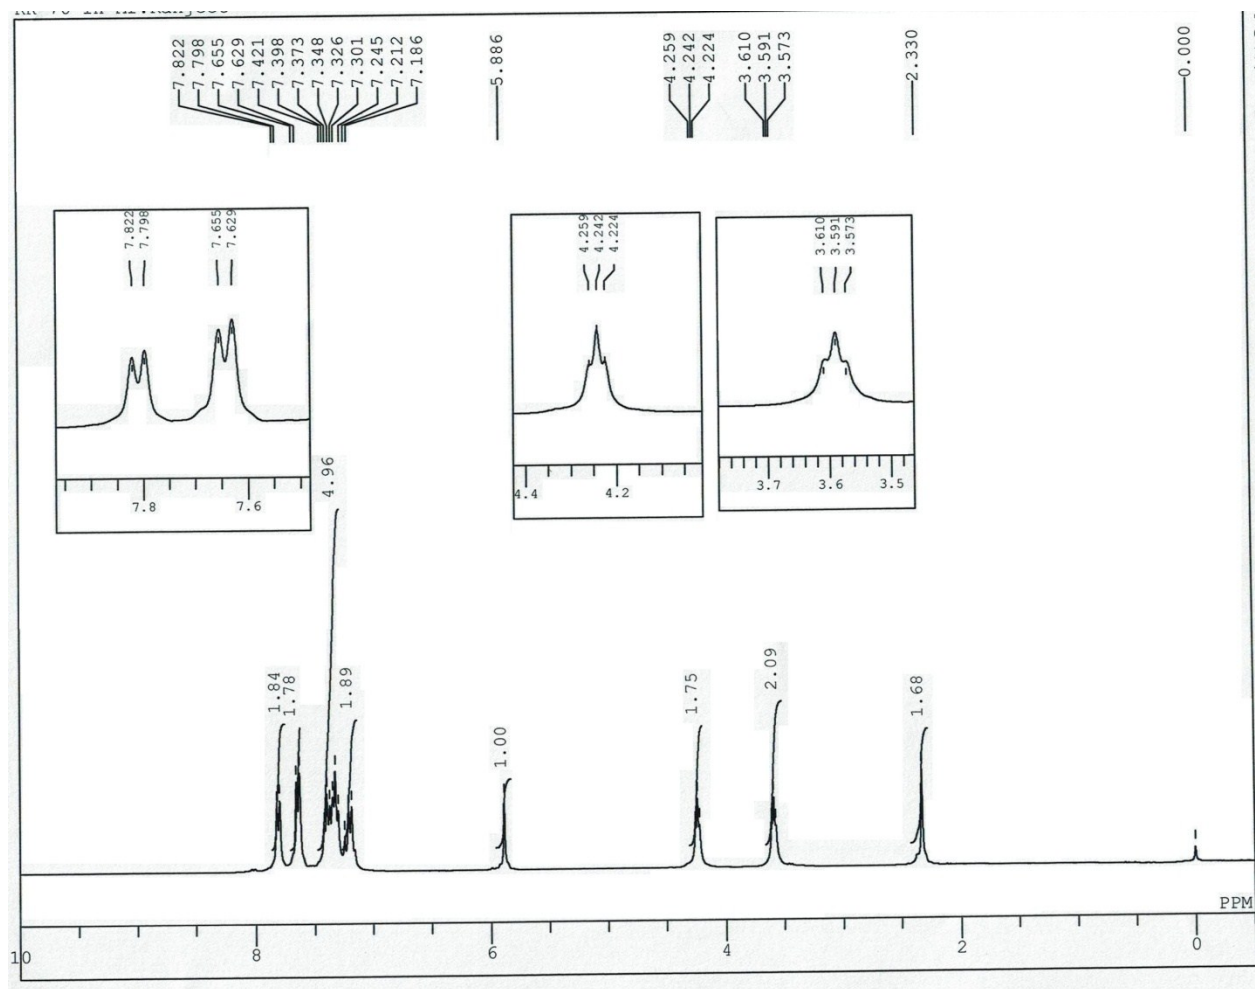

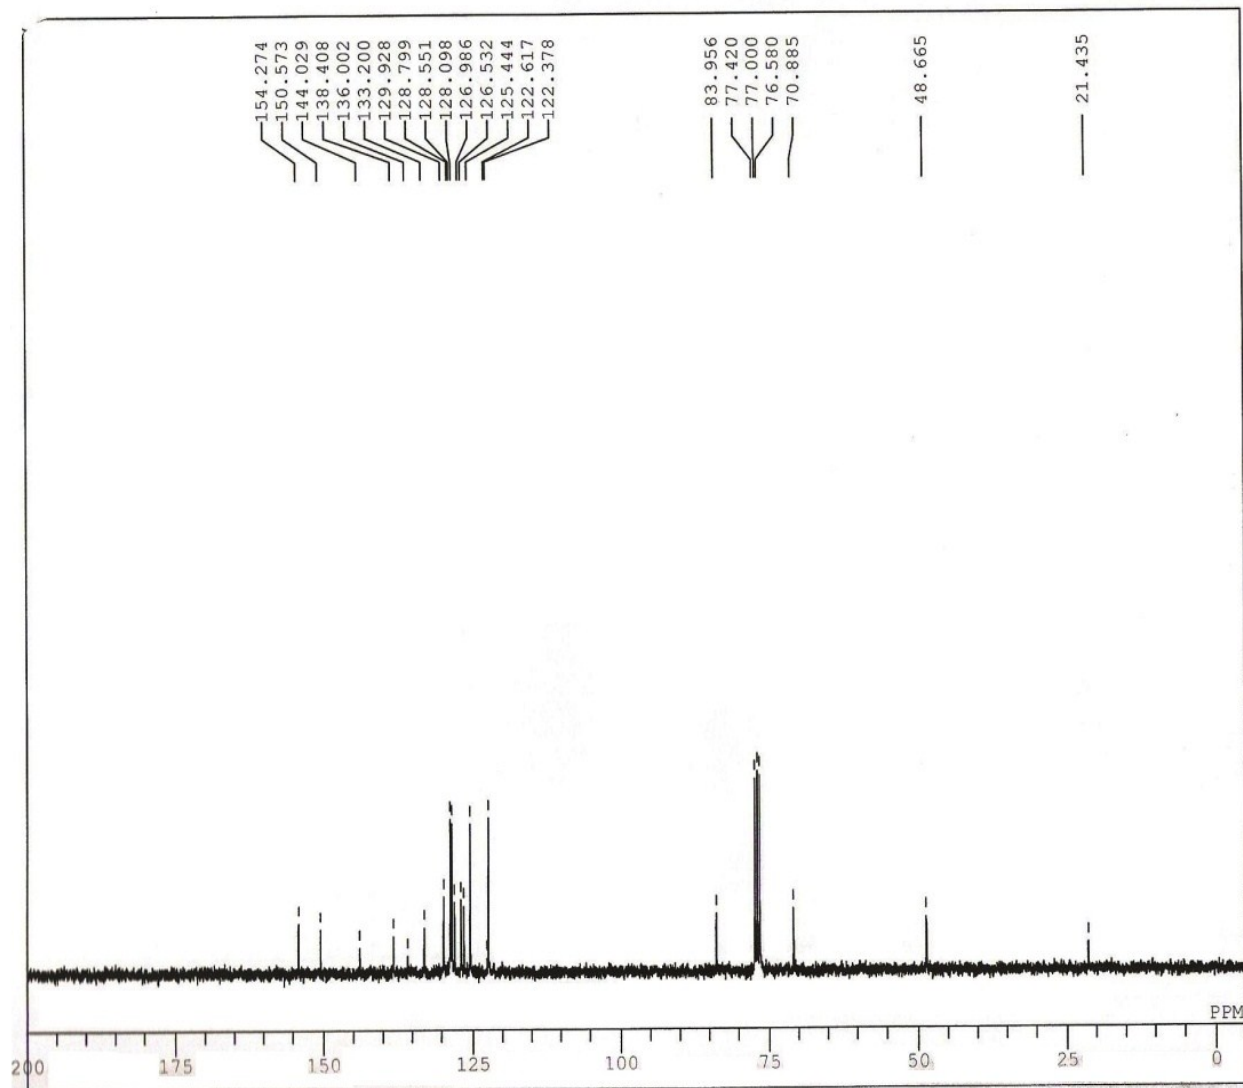



**<sup>1</sup>H-NMR and <sup>13</sup>C-NMR spectra of N,N-bis(2-(1,3-dioxisoindolin-2-yl)ethyl)-4-methylbenzenesulfonamide (2d):**

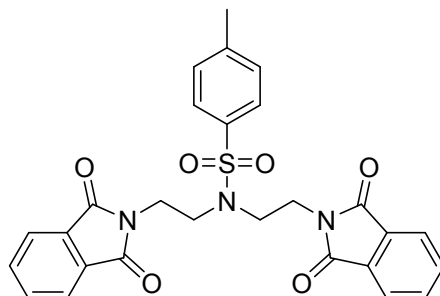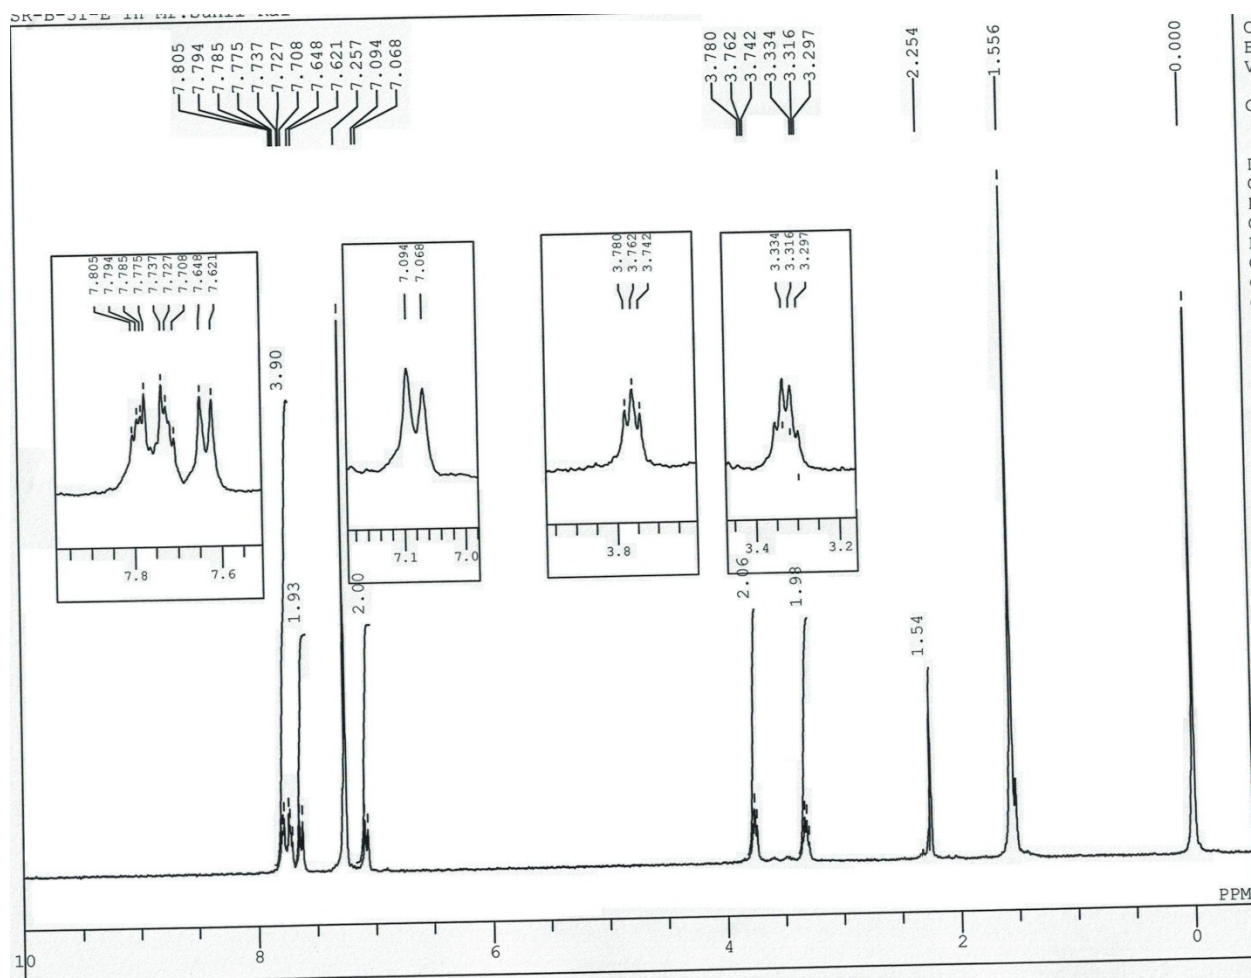

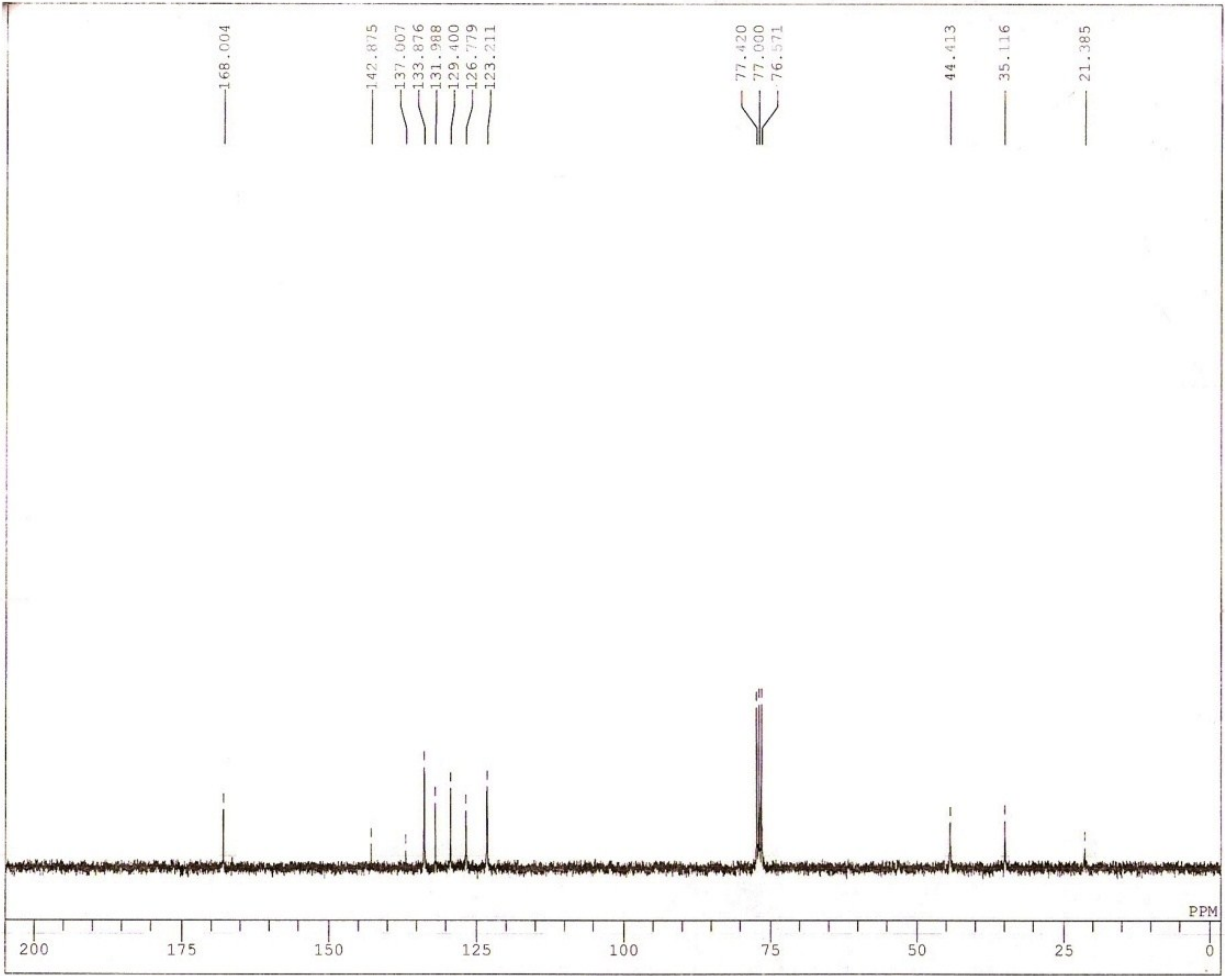

Supplement: c5ra12230a1.pdf [file c5ra12230a1.pdf]
